# Supplementary material
Source: publisher site journal article supplement (http://www.kjim.org/upload/media/kjim-2020-064-suppl5.pdf)
Supplement: Supplementary file 1 [file kjim-2020-064-suppl5.pdf]

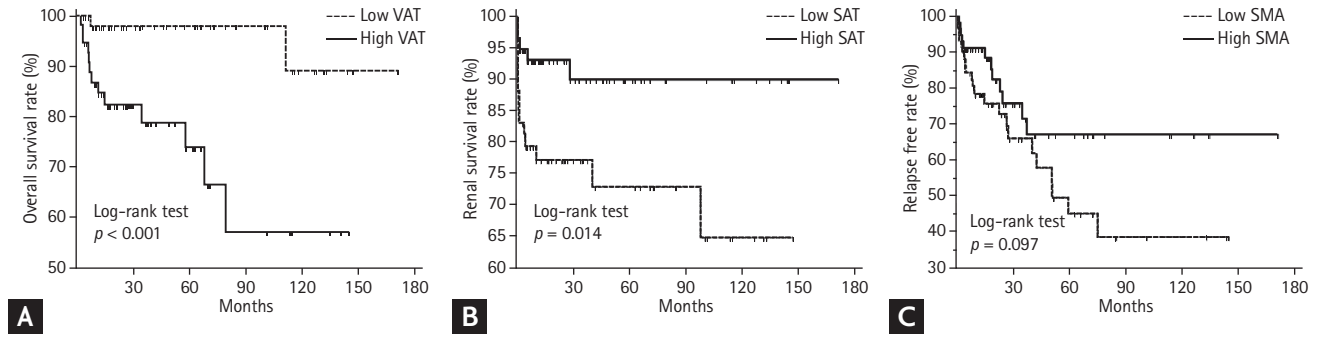

**Supplementary Figure 1.** Kaplan-Meier curve analysis for overall, renal, and relapse-free survival rates according to visceral adipose tissue (VAT), subcutaneous adipose tissue (SAT), and skeletal muscle area (SMA) in patients with anti-neutrophil cytoplasmic antibody-associated vasculitis. The overall survival rate (A), renal survival rate (B), and relapse-free survival rate (C) are compared according to VAT, SAT, and SMA.
